# Supplementary material for: CDK9 regulates neointima formation following vascular injury via targeting transcription factor Twist1
Source: Research Square preprint supplement (doi:10.21203/rs.3.rs-8452448/v1), 2026-01-07
Supplement: Supplementary file 1 [file 03250b23dbf0f04583d23c6d.docx]

**SUPPLEMENTARY MATERIALS**

**Supplementary Figures**


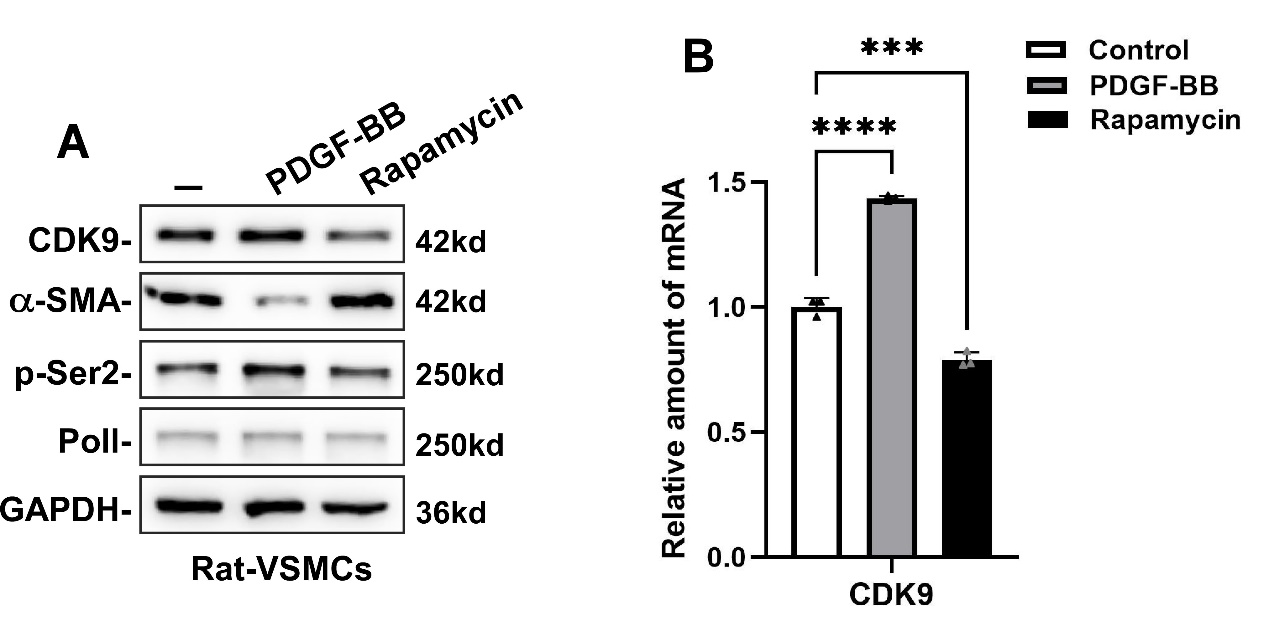


**Supplementary Figure 1. The CDK9 level after PDGF-BB** **or Rapamycin treatment in rat-VSMCs. (A)** Western blot analysis of CDK9, p-Ser2, α-SMA and PoII levels in rat-VSMCs after PDGF-BB or Rapamycin treatment for 24 h. **(B)** The mRNA level of CDK9 was determined by qRT-PCR in rat-VSMCs after PDGF-BB or Rapamycin treatment for 24 h. GAPDH was used as the housekeeping control. Data shown are the means ± SD.


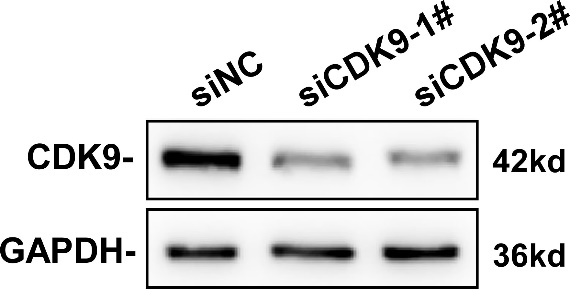


**Supplementary Figure 2. The knockdown efficacy of CDK9 siRNAs.** VSMCs were transfected with siNC (negative control), siCDK9-1#, or siCDK9-2#. The expression of CDK9 was detected by Western blot.

**Supplementary Tables**

**Supplementary Table S1.** **Primers used for qRT-PCR**

| **Gene** | **Forward** | **Reverse** |
| --- | --- | --- |
| h-GAPDH | GAAGGTGAAGGTCGGAGTC | GAAGATGGTGATGGGATTTC |
| h-CDK9 | ACTTCTGCGAGCATGACCTT | AAAGTCTGCCAGCTTCAGGA |
| h-α-SMA | GTCCCAGACATCAGGGAGTAA | TCGGATACTTCAGCGTCAGGA |
| h-SM22a | CCGTGGAGATCCCAACTGG | CCATCTGAAGGCCAATGACAT |
| h-CNN1 | ATGTCCTCTGCTCACTTC | ATACTTCTGGGCCAGCTTGTT |
| h-PCNA | GGCGTGAACCTCACCAGTAT | TCTCGGCATAACGTGCAAA |
| h-Twist1 | ACCCAGTCGCTGAACGAG | CCAGACCGAGAAGGCGTA |
| Rat-GAPDH | AGACAGCCGCATCTTCTTGT | CTTGCCGTGGGTAGAGTCAT |
| Rat-Twist1 | GTCGCTGAACGAGGCATT | CCAGACGGAGAAGGCGTA |
| Rat-CDK9 | AGCTCTGTGGCTCCATCACT | AAGTCATGGTTGAGGGCATC |
| Rat-SM22a | CACCTATCCTCAGCCTCAGC | TTCAAAGGACATTGGCTTCC |

**Supplementary Table S2.** **The dilution concentration of the primary antibodies used in Western blot assays and immunofluorescence staining**

| **Antibody** | **Brand** | **Cat No.** | **Dilution** |
| --- | --- | --- | --- |
| CDK9 | Abclonal | A0886 | 1:500 |
| p-Ser2 | Bethyl | A300-654A | 1:1000 |
| α-SMA | Boster | BM0002 | 1:500 |
| POII | santacruz | sc-55492 | 1:500 |
| GAPDH | Abclonal | A19056 | 1:2000 |
| KLF4 | Abclonal | A13673 | 1:500 |
| PCNA | CST | 13110S | 1:500 |
| OPN | Abclonal | A21084 | 1:500 |
| SM22a | Proteintech | 60213-1-Ig | 1:500 |
| CNN1 | Abclonal | A3734 | 1:500 |
| Vimentin | Abcam | ab92547 | 1:1000 |
| Twist1 | Proteintech | 25465-1-AP | 1:500 |
| Twist1 | Abclonal | A3237 | 1:500 |
| α-Tubulin | Abclonal | A6830 | 1:2000 |

**Supplementary Table S3.** **siRNA sequences of CDK9 used in this study**

| **Items** |  | **Sequences of siRNA (5’-3’)** |
| --- | --- | --- |
| siCDK9-1# | sense | GGUAGUAAUACCGUGGUUTT |
| antisense | ACACCAGGUAAUACUACCTT |
| siCDK9-2# | sense | GUGGACACAUCUAUGAGCUGUTT |
| antisense | ACAGCUCUAUGAUGUUGUCCACTT |
| Negative control | sense | UUCUCCGAACGUGUCACGUTT |
| antisense | ACGUGACACGUUCGGAGAATT |
